# Supplementary material
Source: HighWire-hosted journal article supplement (https://www.qdcxjkg.com/highwire/filestream/121524/field_highwire_adjunct_files/6/ERJ-00541-2015_Figure_S6.pdf)

**FIGURE S6.**

PDI based on the Borg score

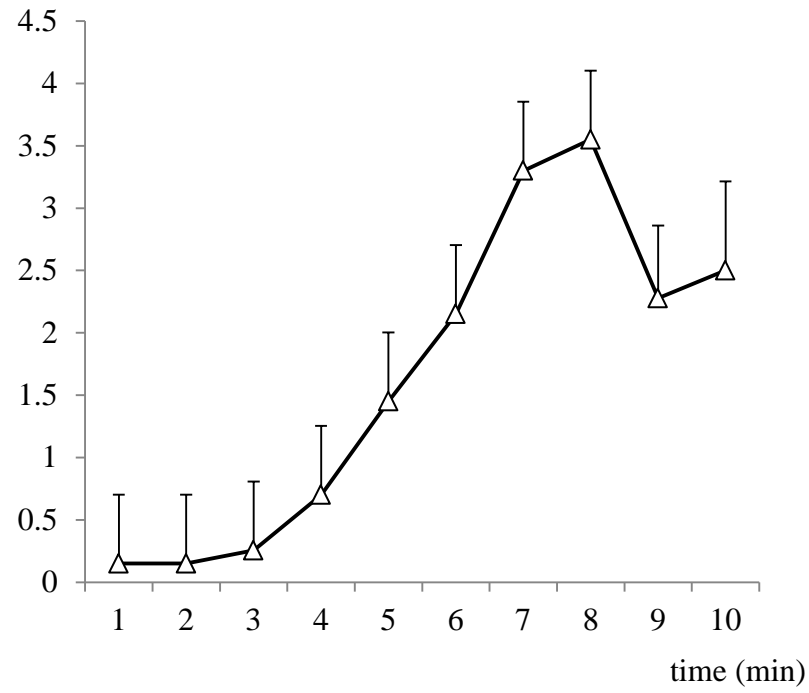

Supplement: ERJ-00541-2015_Figure_S6.pdf [file ERJ-00541-2015_Figure_S6.pdf]
